# Supplementary material
Source: PubMed Central journal article supplement (PMC5512225)
Supplement: JB.00278-17_zjb999094474s1.pdf [file JB.00278-17_zjb999094474s1.pdf]

## SUPPLEMENTARY INFORMATION

### **Inhibition of *Staphylococcus aureus* cell wall biosynthesis by desleucyl-oritavancin: a quantitative peptidoglycan composition analysis by mass spectrometry**

**James D. Chang,<sup>1</sup> Erin E. Foster,<sup>1</sup> Aanchal N. Thadani,<sup>1</sup> Alejandro J. Ramirez,<sup>1</sup> and Sung Joon Kim<sup>1,2</sup>**

<sup>1</sup>Department of Chemistry and Biochemistry, Baylor University, Waco, Texas 76798, United States.

<sup>2</sup>To whom the correspondence should be addressed: Tel: 1-254-710-2531; e-mail address: [Sung J Kim@baylor.edu](mailto:Sung_J_Kim@baylor.edu); Fax: 1-254-710-4272.

Running title: LC-MS analysis of oritavancin-treated *S. aureus*

Keywords: *S. aureus*, peptidoglycan, oritavancin, and LC-MS

| Muropeptides                                  | Cross-linking efficiency ( $\rho_{CL}$ ) <sup>†</sup> |                                             | P value <sup>**</sup> |
|-----------------------------------------------|-------------------------------------------------------|---------------------------------------------|-----------------------|
|                                               | des-Ori (0 $\mu\text{g/mL}$ ) <sup>*</sup>            | des-Ori (10 $\mu\text{g/mL}$ ) <sup>*</sup> |                       |
| All muropeptides                              | 0.636 $\pm$ 0.005                                     | 0.630 $\pm$ 0.002                           | 0.024                 |
| With a terminal pentaglycine bridge structure | 0.632 $\pm$ 0.006                                     | 0.6274 $\pm$ 0.002                          | 0.092                 |
| Without a pentaglycine terminal bridge        | 0.686 $\pm$ 0.003                                     | 0.667 $\pm$ 0.010                           | 0.004                 |
| Tripeptide stem structure                     | 0.649 $\pm$ 0.016                                     | 0.625 $\pm$ 0.023                           | 0.053                 |
| Tetrapeptide stem structure                   | 0.593 $\pm$ 0.016                                     | 0.625 $\pm$ 0.002                           | 0.003                 |
| Pentapeptide stem structure                   | 0.639 $\pm$ 0.003                                     | 0.631 $\pm$ 0.004                           | 0.008                 |

<sup>†</sup> Cross-linking efficiencies calculated based on equation in Fig. 3b.

<sup>\*</sup> All error bars represent 95% confidence interval (n = 3).

<sup>\*\*</sup> Unpaired Student's t-test.

**Table S1.** Cross-linking efficiency of muramidase digested PG from isolated cell walls of *S. aureus* grown in absence or in presence of des-Ori (10  $\mu\text{g/ml}$ ) classified based on PG-stem modifications.

| Muropeptide Acetylation states | Cross-linking efficiency ( $\rho_{CL}$ ) <sup>†</sup> |                                             | P value <sup>**</sup> |
|--------------------------------|-------------------------------------------------------|---------------------------------------------|-----------------------|
|                                | des-Ori (0 $\mu\text{g/mL}$ ) <sup>*</sup>            | des-Ori (10 $\mu\text{g/mL}$ ) <sup>*</sup> |                       |
| -1                             | 0.631 $\pm$ 0.015                                     | 0.607 $\pm$ 0.023                           | 0.056                 |
| 0                              | 0.628 $\pm$ 0.008                                     | 0.622 $\pm$ 0.005                           | 0.117                 |
| 1 (or higher)                  | 0.642 $\pm$ 0.003                                     | 0.638 $\pm$ 0.001                           | 0.011                 |

<sup>†</sup> Normalized percentile composition based on the sum of integrated XIC of selected ions.

<sup>\*</sup> All error bars represent 95% confidence interval (n = 3).

<sup>\*\*</sup> Unpaired Student's t-test.

**Table S2.** Cross-linking efficiency of muramidase digested PG from isolated cell walls of *S. aureus* grown in absence or in presence of des-Ori (10  $\mu\text{g/ml}$ ) classified based on acetylation state.

| Muropeptides   |                   | Composition (%) <sup>†</sup>   |                                 | P value <sup>**</sup> |
|----------------|-------------------|--------------------------------|---------------------------------|-----------------------|
| PG-stem length | Acetylation state | des-Ori (0 µg/mL) <sup>*</sup> | des-Ori (10 µg/mL) <sup>*</sup> |                       |
| 3              | -1                | 9.764 ± 2.964                  | 15.863 ± 2.964                  | 0.010                 |
|                | 0                 | 19.450 ± 10.808                | 10.733 ± 0.808                  | 0.063                 |
|                | 1                 | 70.787 ± 10.121                | 73.405 ± 2.443                  | 0.469                 |
| 4              | -1                | 2.838 ± 0.356                  | 5.227 ± 3.638                   | 0.106                 |
|                | 0                 | 35.386 ± 6.176                 | 42.133 ± 3.375                  | 0.038                 |
|                | 1                 | 61.776 ± 5.895                 | 52.641 ± 0.295                  | 0.008                 |
| 5              | -1                | 6.063 ± 1.487                  | 5.674 ± 2.598                   | 0.700                 |
|                | 0                 | 39.892 ± 2.287                 | 40.235 ± 3.910                  | 0.821                 |
|                | 1                 | 54.045 ± 2.869                 | 54.091 ± 1.984                  | 0.968                 |

<sup>†</sup> Normalized percentile composition based on the sum of integrated XIC of selected ions.

<sup>\*</sup> All error bars represent 95% confidence interval (n = 3).

<sup>\*\*</sup> Unpaired Student's t-test.

**Table S3.** Normalized PG composition of muramidase digested cell walls isolated from *S. aureus* grown in absence or in presence of des-Ori (10 µg/ml) classified based on PG-stem length and acetylation state.
